# Supplementary material
Source: Research Square preprint supplement (doi:10.21203/rs.3.rs-8863622/v1)
Supplement: Supplementary file 1 [file 038c082a1723670c323832f2.xlsx]

## Sheet: Sheet1
	a1	a2	a3	a4	b5	b6	b7	b8	b9	c10	c11	c12	c13	d14	d15	d16	d17	d18	e19	e20	e21	e22	f23	f24	f25	f26	f27	g28	g29	g30	g31	g32	g33	g34	h35	h36	h37	h38	h39
1	5	5	5	5	5	5	5	5	5	5	5	5	5	5	5	5	5	5	5	5	5	5	5	5	5	5	5	5	5	5	5	5	5	5	5	5	5	5	5
2	3	3	5	5	5	5	4	4	5	4	2	1	4	2	3	3	3	2	4	3	4	4	5	3	5	5	4	3	3	4	5	1	5	5	5	5	4	5	5
3	5	5	5	5	5	5	5	3	3	5	5	5	4	5	5	5	4	4	5	3	5	5	4	4	4	4	4	5	5	5	5	5	5	5	5	5	5	3	5
4	5	5	5	5	5	5	5	4	5	5	5	5	5	5	5	5	5	2	5	5	5	5	5	5	5	5	4	5	5	5	5	5	5	5	5	5	5	3	5
5	5	5	5	5	5	5	5	5	5	5	5	5	5	5	5	5	5	5	5	5	5	5	5	5	5	5	5	5	5	5	5	5	5	5	5	5	5	5	5
6	5	5	5	5	5	5	5	5	4	5	5	5	5	5	5	5	5	4	5	5	5	5	5	5	5	5	5	5	5	4	5	5	5	5	5	5	5	5	5
7	5	5	5	5	5	5	5	4	4	5	5	4	5	4	5	5	4	4	5	5	5	4	5	5	5	5	4	5	5	5	5	5	5	5	5	5	5	4	5
8	4	3	4	4	5	5	5	3	4	3	3	3	4	4	3	4	3	3	4	3	4	4	3	4	3	3	3	4	4	4	4	4	5	4	5	5	5	5	4
9	5	5	5	5	5	5	3	4	5	5	5	4	5	4	5	5	5	5	5	5	5	5	5	5	5	5	5	5	5	5	5	5	5	5	5	5	5	5	5
10	5	5	5	5	5	5	5	4	5	4	5	4	4	4	5	5	4	5	5	4	5	5	5	5	5	5	5	5	5	5	5	5	5	5	5	5	5	5	5
11	5	5	4	5	5	5	5	5	5	4	5	5	5	5	5	4	4	4	5	5	5	5	5	5	5	5	5	5	5	5	5	5	5	5	5	5	5	2	5
12	5	5	5	5	5	5	5	4	5	5	5	5	5	3	5	5	3	5	5	2	5	4	5	5	5	5	4	5	5	4	5	5	5	5	5	5	5	5	5
13	5	5	5	5	5	5	5	4	5	5	5	4	5	3	5	5	3	4	5	4	5	4	5	5	5	5	5	5	5	5	5	4	5	4	5	5	4	5	5
14	5	5	5	5	5	5	4	5	5	4	5	3	4	5	4	4	3	5	3	4	5	5	5	5	5	5	5	5	5	5	4	5	3	5	5	5	5	4	5
15	5	5	5	5	5	5	5	5	5	5	5	5	5	5	5	5	5	5	5	5	5	5	5	5	5	3	5	5	5	5	5	5	5	5	5	5	3	5	5
full score ratio	0.866667	0.866667	0.866667	0.933333	1	1	0.8	0.4	0.733333	0.666667	0.866667	0.533333	0.666667	0.533333	0.8	0.733333	0.4	0.466667	0.8	0.466667	0.866667	0.666667	0.866667	0.8	0.866667	0.8	0.6	0.866667	0.866667	0.733333	0.866667	0.8	0.933333	0.866667	1	1	0.8	0.666667	0.933333
I-CVI	0.93	0.87	1	1	1	1	0.93	0.87	0.93	0.93	0.87	0.8	1	0.8	0.87	0.93	0.67	0.8	0.93	0.67	1	1	0.93	0.93	0.93	0.87	0.93	0.93	0.93	1	1	0.933333	0.933333	1	1	1	0.933333	0.8	1
	0.333333

## Sheet: Sheet3
	第二轮s-cvi/ave
0.83	0.93
0.78	0.87
1	1
1	1
0.89	1
0.78	0.93
0.94	0.93
1	1
0.94	0.93
0.89	0.93
0.89	0.93
0.83	0.87
0.94	1
0.67	1
0.72	0.87
0.83	0.93
0.67	1
0.94	1
0.72	0.93
0.89	0.93
0.83	0.93
0.94	0.87
0.94	0.93
1	0.93
0.89	0.93
0.67	1
0.83	1
0.94	1
0.78	1
1	1
0.83	0.952333
0.94
0.866875

## Sheet: Sheet2
				描述统计
					个案数	平均值	标准差			变异系数
				VAR00001	15	4.8	0.56061			0.116794
				VAR00002	15	4.7333	0.70373			0.148676
				VAR00003	15	4.8667	0.35187			0.0723016
				VAR00004	15	4.9333	0.2582			0.0523382
				VAR00005	15	5	0			0
				VAR00006	15	5	0			0
				VAR00007	15	4.7333	0.59362			0.125414
				VAR00008	15	4.2667	0.70373			0.164935
				VAR00009	15	4.6667	0.61721			0.132258
				VAR00010	15	4.6	0.63246			0.137491
				VAR00011	15	4.6667	0.89974			0.1928
				VAR00012	15	4.2	1.14642			0.272957
				VAR00013	15	4.6667	0.48795			0.10456
				VAR00014	15	4.2667	0.96115			0.225268
				VAR00015	15	4.6667	0.72375			0.155088
				VAR00016	15	4.6667	0.61721			0.132258
				VAR00017	15	4.0667	0.88372			0.217306
				VAR00018	15	4.1333	1.0601			0.256478
检验统计				VAR00019	15	4.7333	0.59362			0.125414
个案数	15			VAR00020	15	3.9333	1.27988			0.325396
肯德尔 Wa	0.222591			VAR00021	15	4.8667	0.35187			0.0723016
卡方	126.877			VAR00022	15	4.6667	0.48795			0.10456
自由度	38			VAR00023	15	4.8	0.56061			0.116794
渐近显著性	1.68432e-11			VAR00024	15	4.7333	0.59362			0.125414
a. 肯德尔协同系数				VAR00025	15	4.8	0.56061			0.116794
				VAR00026	15	4.6667	0.72375			0.155088
				VAR00027	15	4.5333	0.63994			0.141164
				VAR00028	15	4.8	0.56061			0.116794
				VAR00029	15	4.8	0.56061			0.116794
				VAR00030	15	4.7333	0.45774			0.0967063
				VAR00031	15	4.8667	0.35187			0.0723016
				VAR00032	15	4.6	1.0556			0.229478
				VAR00033	15	4.8667	0.5164			0.106109
				VAR00034	15	4.8667	0.35187			0.0723016
				VAR00035	15	5	0			0
				VAR00036	15	5	0			0
				VAR00037	15	4.7333	0.59362			0.125414
				VAR00038	15	4.4	0.98561			0.224002
				VAR00039	15	4.9333	0.2582			0.0523382
				有效个案数（成列）	15
