# Supplementary material
Source: Research Square preprint supplement (doi:10.21203/rs.3.rs-8863622/v1)
Supplement: Supplementary file 2 [file e8b0209107e11a4f4f42f942.xlsx]

## Sheet: Sheet3
	a1	a2	a3	a4	b5	b6	b7	b8	b9	b10	b11	b12	b13	b14	c15	c16	c17	c18	c19	c20	d21	d22	d23	d24	e25	e26	e27	e28	f29	f30	f31	f32	f33	g34	g35	g36	g37	g38	g39	g40	h41	h42	h43	h44	h45
Mean	4.3333	4.1667	3.9444	4	4.8333	4.8889	4.5	4	4	4.2222	4.6667	4.1111	4.7222	4.4444	4.5	4.5	4.2778	4.4444	4.2778	3.8889	3.8333	4.3333	4.3333	3.8824	4.7222	4.1667	4.4444	4.2222	4.7222	4.6111	4.6111	4.4444	3.8333	4.4444	4.5	4.2222	4.8889	4.4444	4.2222	4.3333	4.6111	4.7778	4.6111	4.5556	4.5
SD	0.76696	0.78591	1.05564	1.02899	0.38348	0.32338	0.85749	1.06066	1.13759	1.06027	0.59409	1.18266	0.46089	0.98352	0.70711	0.70711	0.89479	0.6157	0.95828	1.02262	1.33945	0.90749	0.76696	0.92752	0.57451	0.85749	0.70479	1.06027	0.57451	0.60768	0.50163	0.85559	1.38267	0.78382	0.78591	0.94281	0.32338	0.78382	1.06027	0.97014	0.6978	0.42779	0.60768	0.51131	0.70711
CV	0.176992	0.188617	0.26763	0.257248	0.0793412	0.0661458	0.190553	0.265165	0.284398	0.251118	0.127304	0.287675	0.0976007	0.221294	0.157136	0.157136	0.209171	0.138534	0.224012	0.262959	0.349425	0.209422	0.176992	0.238904	0.121662	0.205796	0.158579	0.251118	0.121662	0.131786	0.108787	0.19251	0.3607	0.176361	0.174647	0.223298	0.0661458	0.176361	0.251118	0.22388	0.15133	0.089537	0.131786	0.112238	0.157136
N	17
Wa	0.1413
X2	105.692
df	44
p	5.44468e-07
a. Kendall’s W
	a1	a2	a3	a4	b5	b6	b7	b8	b9	b10	b11	b12	b13	b14	c15	c16	c17	c18	c19	c20	d21	d22	d23	d24	e25	e26	e27	e28	f29	f30	f31	f32	f33	g34	g35	g36	g37	g38	g39	g40	h41	h42	h43	h44	h45
Jiang	5	4	4	5	5	4	5	5	4	4	5	5	5	5	5	5	4	5	4	4	4	3	4	3	5	3	3	4	5	5	5	4	1	4	4	4	5	4	4	4	5	5	5	5	5
Ju	5	5	3	5	5	5	2	3	2	2	5	5	5	5	5	5	5	5	5	5	5	5	5	5	5	5	5	5	5	5	5	5	5	5	5	5	5	5	5	5	5	5	5	5	5
Jie	4	4	3	5	5	5	5	4	4	5	4	4	5	5	4	4	4	4	4	4	3	3	3	3	4	4	4	4	5	5	5	5	5	5	5	5	5	5	5	5	4	4	4	4	4
Zhi	4	3	5	2	5	5	5	2	5	5	5	5	5	5	5	4	5	5	5	2	5	5	3	4	5	5	4	3	5	4	4	2	3	5	4	2	5	3	3	4	3	5	5	4	3
Yu	5	4	5	4	5	5	4	5	4	4	5	5	5	5	5	5	5	4	4	4	5	5	5	5	5	5	4	5	5	5	5	5	5	5	5	5	5	5	4	5	5	5	5	5	5
Yuan	3	3	5	5	5	5	5	2	4	4	5	3	5	5	4	4	5	4	4	4	3	3	3	5	3	3	5	4	4	4	4	4	3	5	4	5	4	5	5	5	5	4	4	4	4
Xiang	4	4	4	4	4	4	4	4	4	4	4	4	4	4	4	4	4	4	4	4	4	4	4	4	4	4	4	4	4	4	4	4	4	4	4	4	4	4	4	4	4	4	4	4	4
Jin	3	3	4	5	4	5	4	4	4	5	5	4	4	1	4	5	5	5	2	2	1	5	5	3	5	4	5	5	5	5	4	5	4	5	5	5	5	4	4	5	5	5	5	5	5
Yu	5	5	3	4	5	5	4	4	5	5	5	5	4	4	5	5	4	4	5	4	5	5	4	4	5	3	5	5	3	5	4	3	5	5	5	5	5	5	4	4	5	5	3	4	5
Wang	4	4	4	3	4	5	5	3	3	5	5	4	5	4	3	3	4	4	4	2	4	5	5	3	4	4	5	4	4	4	4	4	4	3	4	4	5	5	4	4	5	4	4	4	5
Hou	3	3	2	4	5	5	5	2	1	3	4	2	4	4	4	4	2	4	4	3	2	4	5	2	5	5	5	3	5	3	5	5	4	4	2	4	5	3	1	4	5	5	5	4	4
Chao	5	5	5	5	5	5	5	5	5	5	5	5	5	5	5	5	5	5	5	5	5	5	5	5	5	5	5	5	5	5	5	5	5	5	5	5	5	5	5	5	5	5	5	5	5
Hong	5	5	4	2	5	5	5	5	5	5	5	5	5	5	5	5	4	5	5	4	5	5	5	5	5	5	5	5	5	5	5	5	5	3	4	3	5	5	3	1	3	5	5	5	5
Juan	5	5	5	4	5	5	5	3	5	5	5	5	5	5	5	5	5	5	5	5	5	3	4	4	5	4	4	4	5	5	5	5	5	5	5	5	5	5	5	4	5	5	5	5	5
Yu	5	5	2	5	5	5	5	4	3	5	3	1	5	4	5	5	5	5	5	4	5	5	5	4	5	5	5	5	5	5	5	5	1	5	5	5	5	4	5	5	5	5	5	5	5
Hui	5	5	5	3	5	5	3	5	5	2	5	3	5	5	5	5	5	5	5	5	2	5	4	4	5	3	5	1	5	5	5	5	2	5	5	3	5	5	5	5	5	5	5	5	3
Mei	4	4	3	4	5	5	5	5	4	3	4	4	4	4	3	5	3	4	2	4	4	3	4	4	5	3	4	5	5	4	4	4	5	4	5	4	5	5	5	4	4	5	4	4	4
Xia	4	4	5	3	5	5	5	5	5	5	5	5	5	5	5	3	3	3	5	5	2	5	5	3	5	5	3	5	5	5	5	5	3	3	5	3	5	3	5	5	5	5	5	5	5
	15	14	12	13	18	18	16	12	14	14	17	14	18	17	16	16	15	17	16	14	12	13	15	12	17	13	16	15	17	17	18	16	12	15	17	14	18	15	15	17	16	18	17	18	16
	9	7	7	7	15	16	12	7	7	10	13	9	13	11	11	11	9	9	9	5	8	11	9	5	14	8	10	9	14	12	11	11	8	11	11	9	16	11	9	9	13	14	12	10	11
I-CVI	0.833333	0.777778	0.666667	0.722222	1	1	0.888889	0.666667	0.777778	0.777778	0.944444	0.777778	1	0.944444	0.888889	0.888889	0.833333	0.944444	0.888889	0.777778	0.666667	0.722222	0.833333	0.666667	0.944444	0.722222	0.888889	0.833333	0.944444	0.944444	1	0.888889	0.666667	0.833333	0.944444	0.777778	1	0.833333	0.833333	0.944444	0.888889	1	0.944444	1	0.888889
	1	2	3	4	5	6	7	8	9	10	11	12	13	14	15	16	17	18	19	20	21	22	23	24	25	26	27	28	29	30	31	32	33	34	35	36	37	38	39	40	41	42	43	44	45
full score ratio	0.5	0.388889	0.388889	0.388889	0.833333	0.888889	0.666667	0.388889	0.388889	0.555556	0.722222	0.5	0.722222	0.611111	0.611111	0.611111	0.5	0.5	0.5	0.277778	0.444444	0.611111	0.5	0.277778	0.777778	0.444444	0.555556	0.5	0.777778	0.666667	0.611111	0.611111	0.444444	0.611111	0.611111	0.5	0.888889	0.611111	0.5	0.5	0.722222	0.777778	0.666667	0.555556	0.611111
						N	18
						Wa	0.134529
						x2	106.547
						df	44																																		0.155556
						p	4.18546e-07
						a. Kendall’s W
